# Supplementary material
Source: PubMed Central journal article supplement (PMC3284248)
Supplement: NIHMS36077-supplement-1.pdf [file NIHMS36077-supplement-1.pdf]

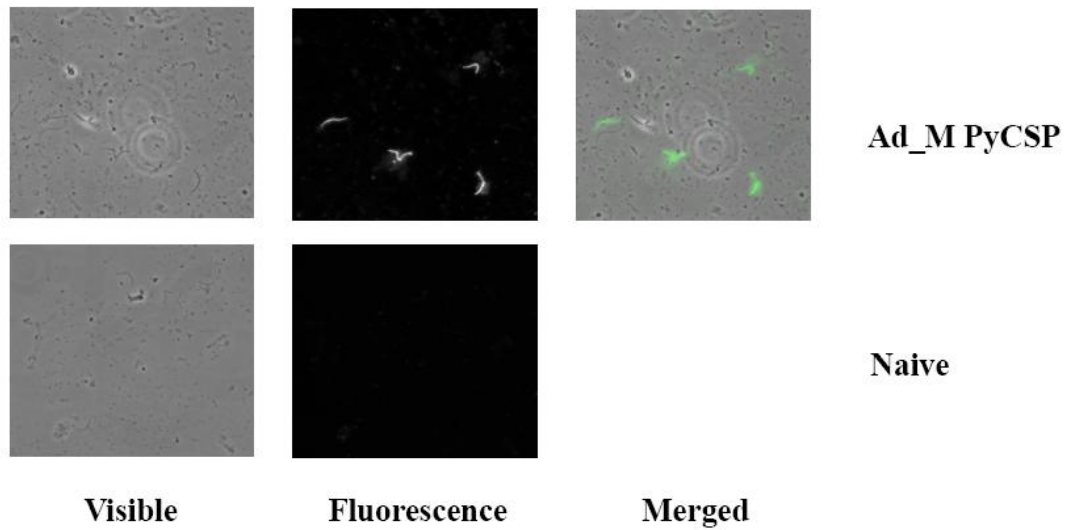

### Supplementary Figure 1

Visible and fluorescence images of *P. yoelii* sporozoites immunostained with PyCSP antibodies raised in mice. *P. yoelii* sporozoites were killed with azide and air dried onto slides. Mice were immunized with  $1 \times 10^{10}$  vp AdHu5-PyCSP and boosted with  $1 \times 10^7$  pfu MVA- PyCSP. Sera were collected two weeks later and were used at a dilution of 1:100. Sera from naïve (non-immunized) mice were also tested. Bound antibodies were detected using goat anti-mouse IgG conjugated to Alexa Fluor<sup>TM</sup> 488.
